# Supplementary material for: Nonparametric Bayesian sparse factor analysis for frequency domain blind source separation without permutation ambiguity
Source: Springer Nature journal article supplement (doi:10.1186/1687-4722-2013-4), 2013-01-22

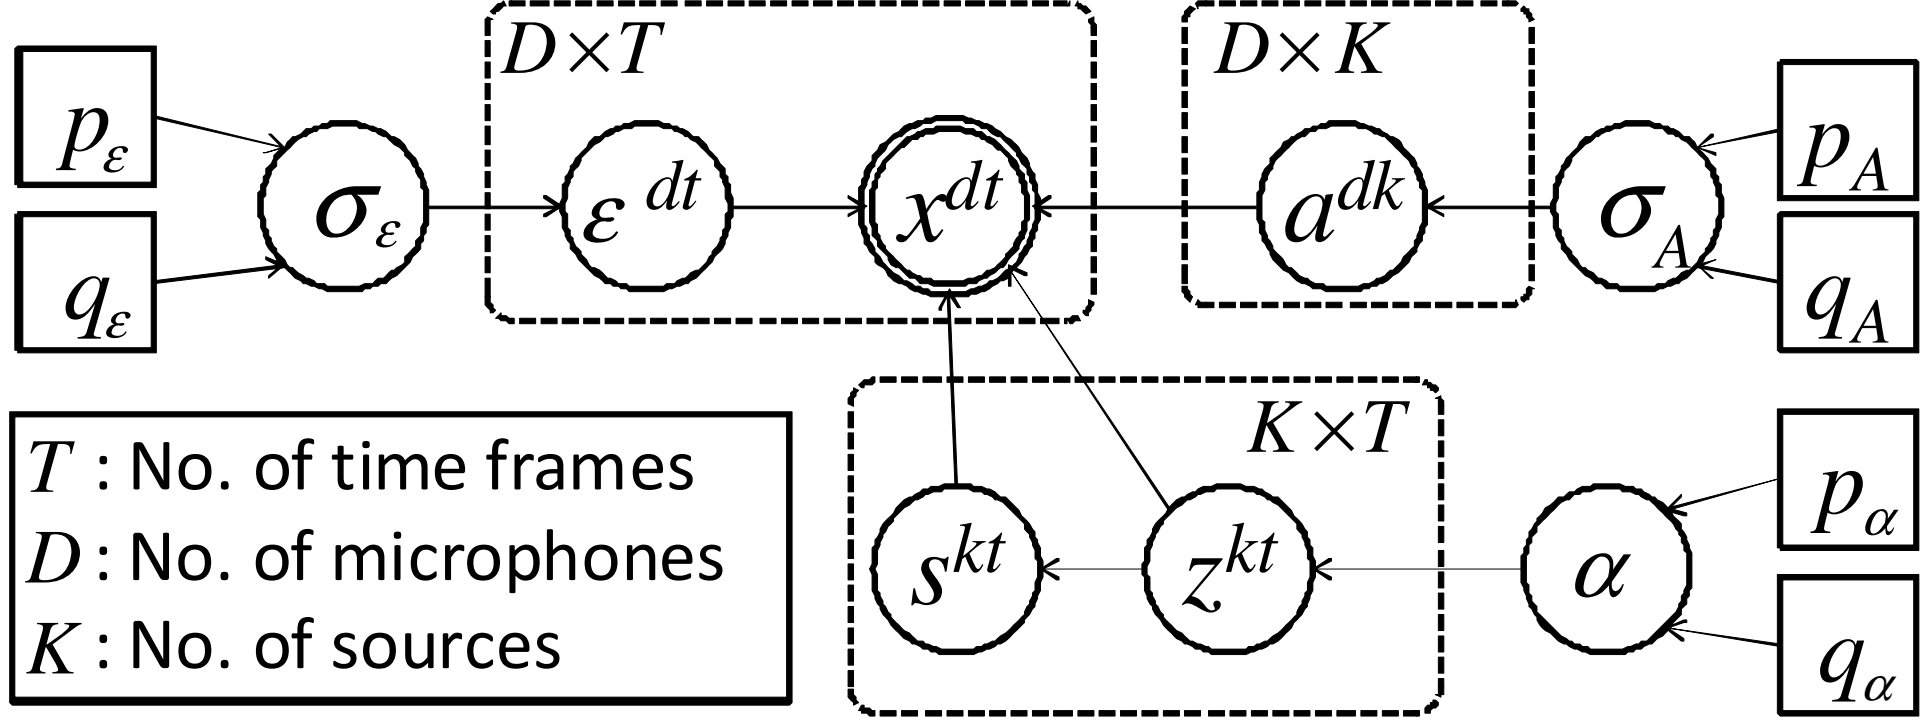

Supplement: 13636_2012_71_MOESM2_ESM.pdf [file 13636_2012_71_MOESM2_ESM.pdf]
